# Supplementary material
Source: PubMed Central journal article supplement (PMC6126902)

Supplementary Fig. 1.

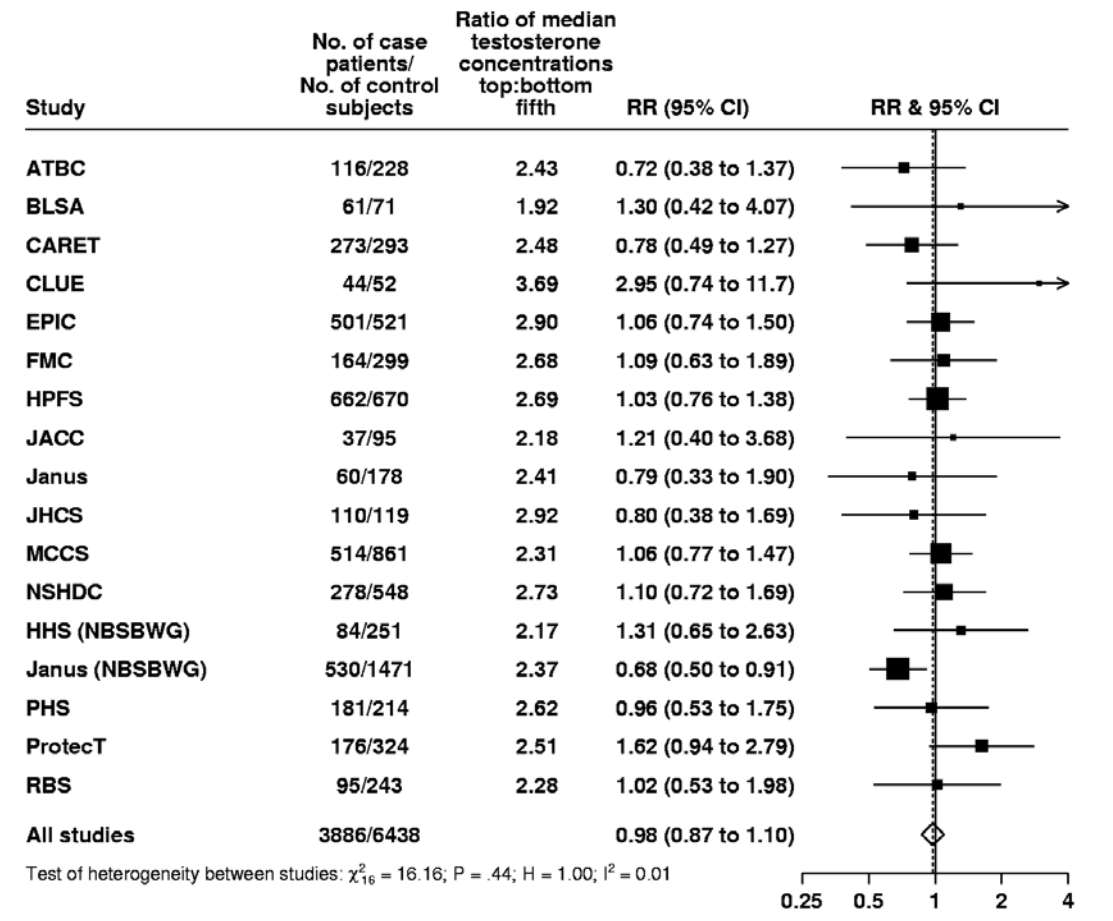

Supplementary Fig. 2.

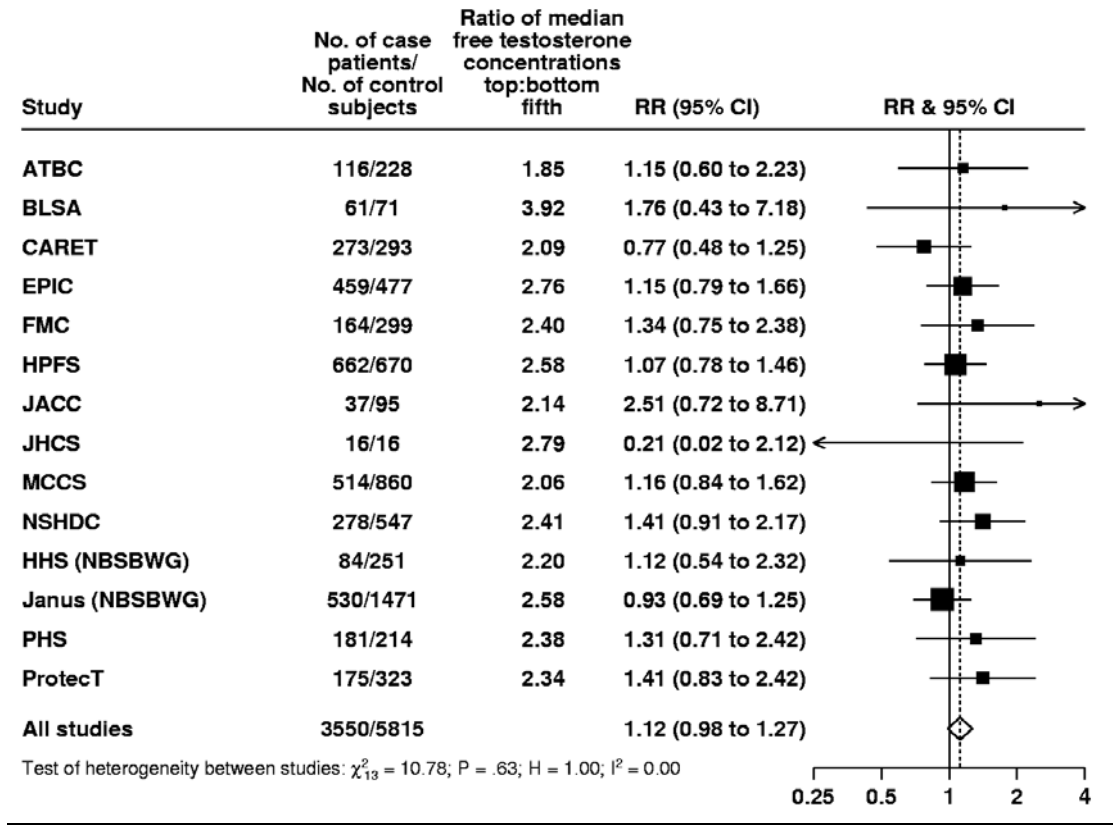

Supplementary Fig. 3.

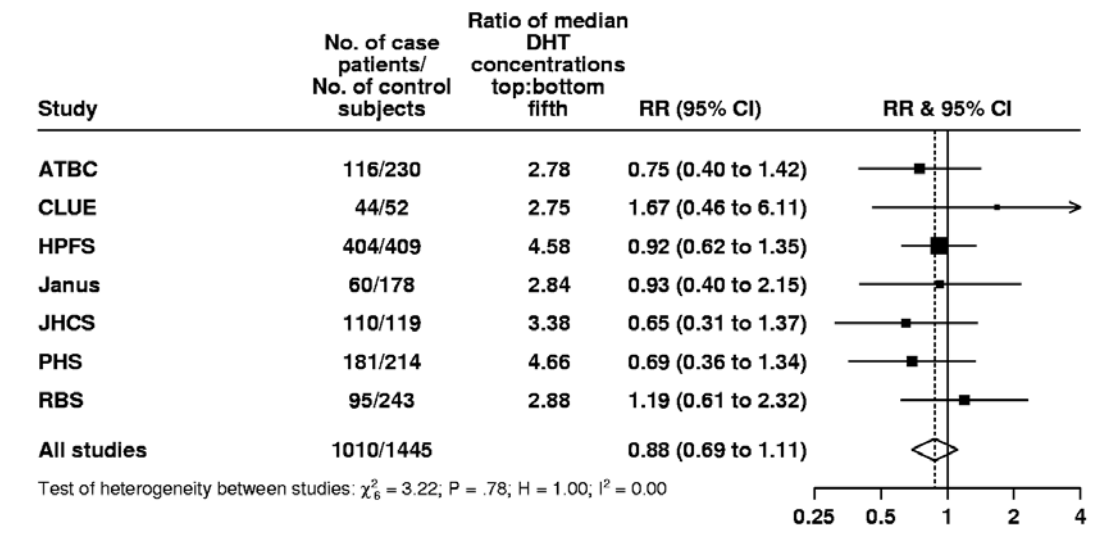

Supplementary Fig. 4.

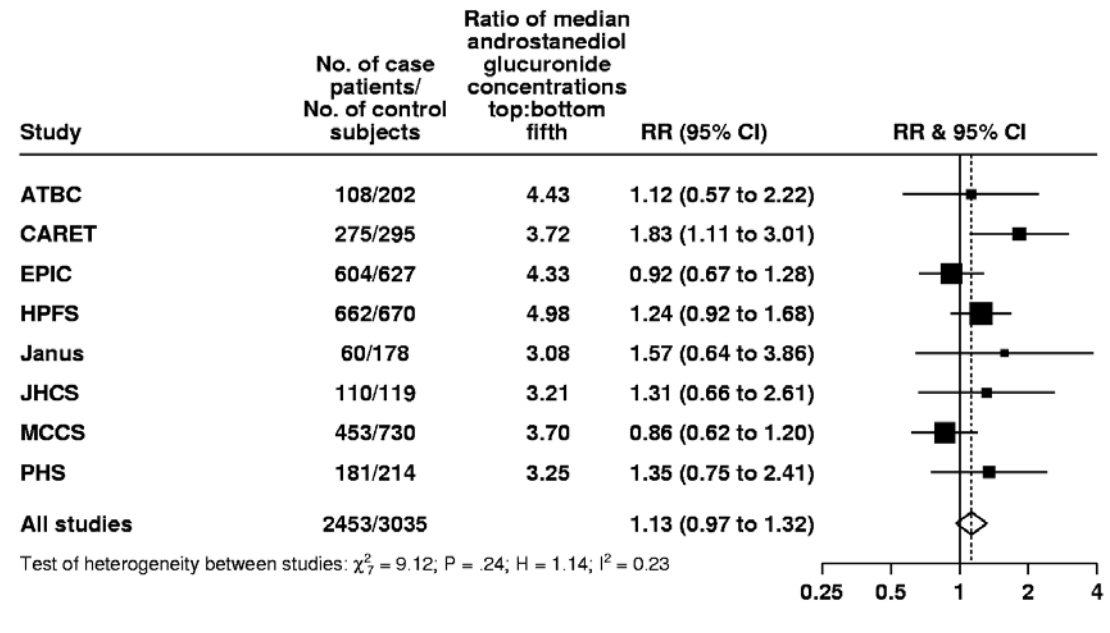

Supplementary Fig. 5.

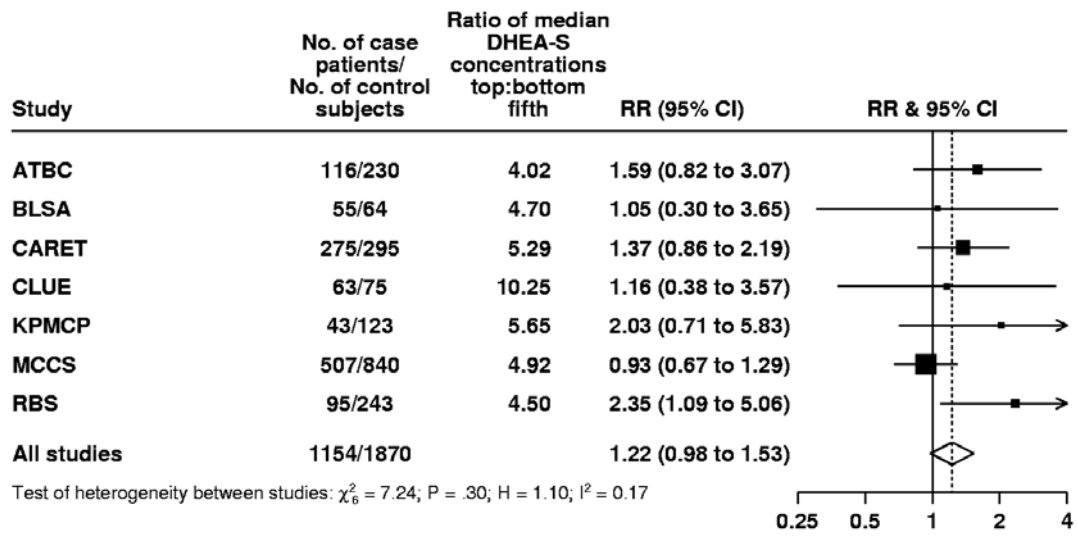

Supplementary Fig. 6.

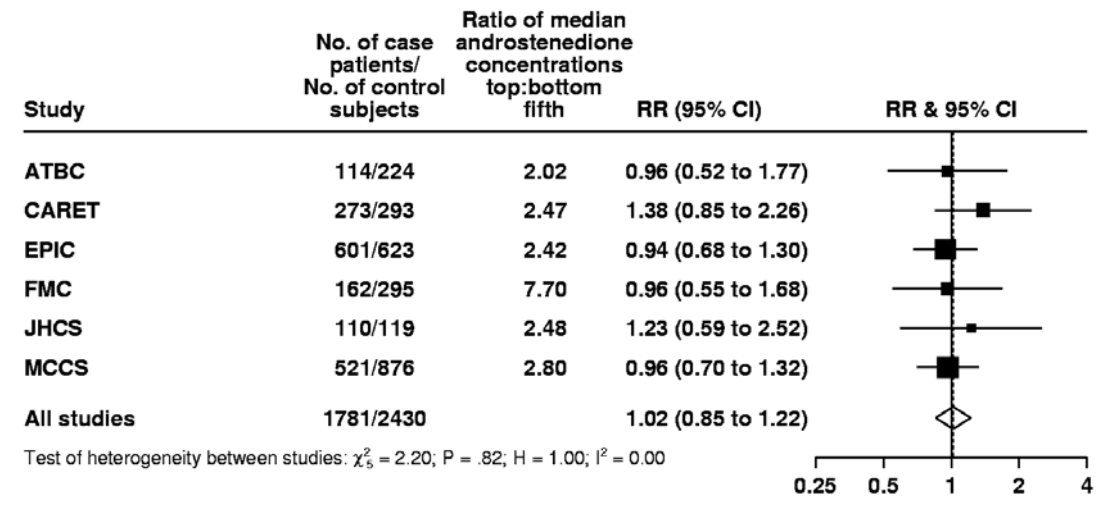

Supplementary Fig. 7.

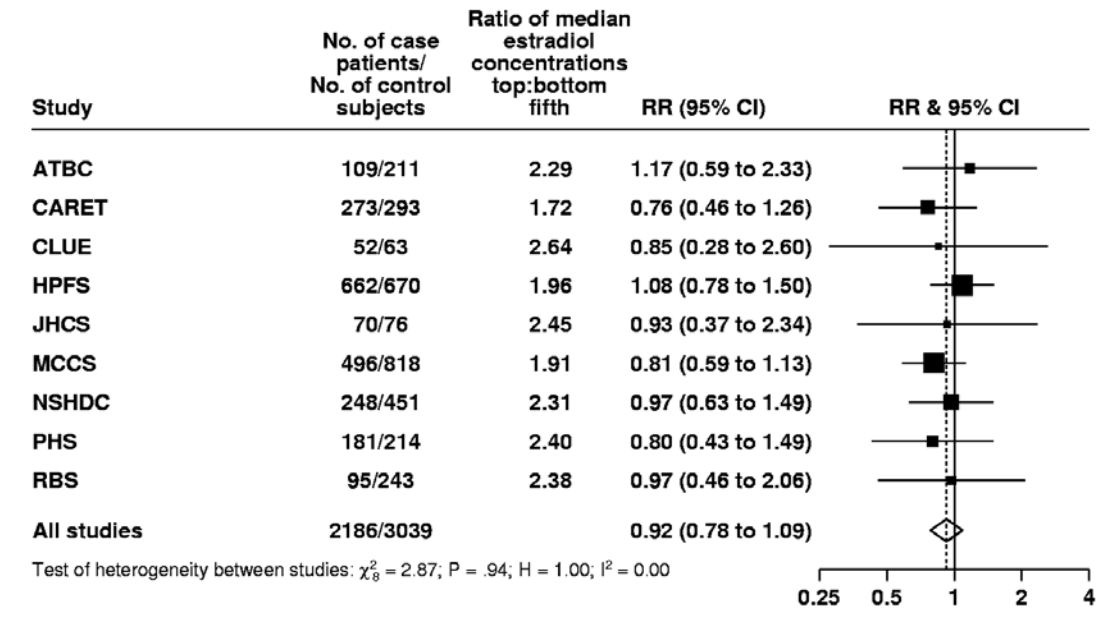

Supplementary Fig. 8.

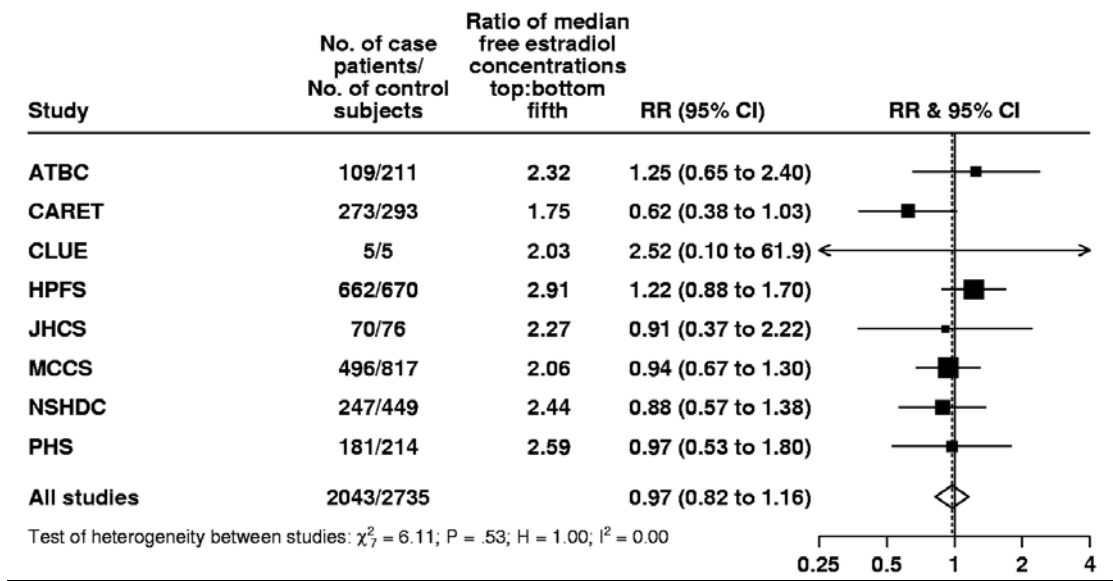



Supplementary Fig. 9.

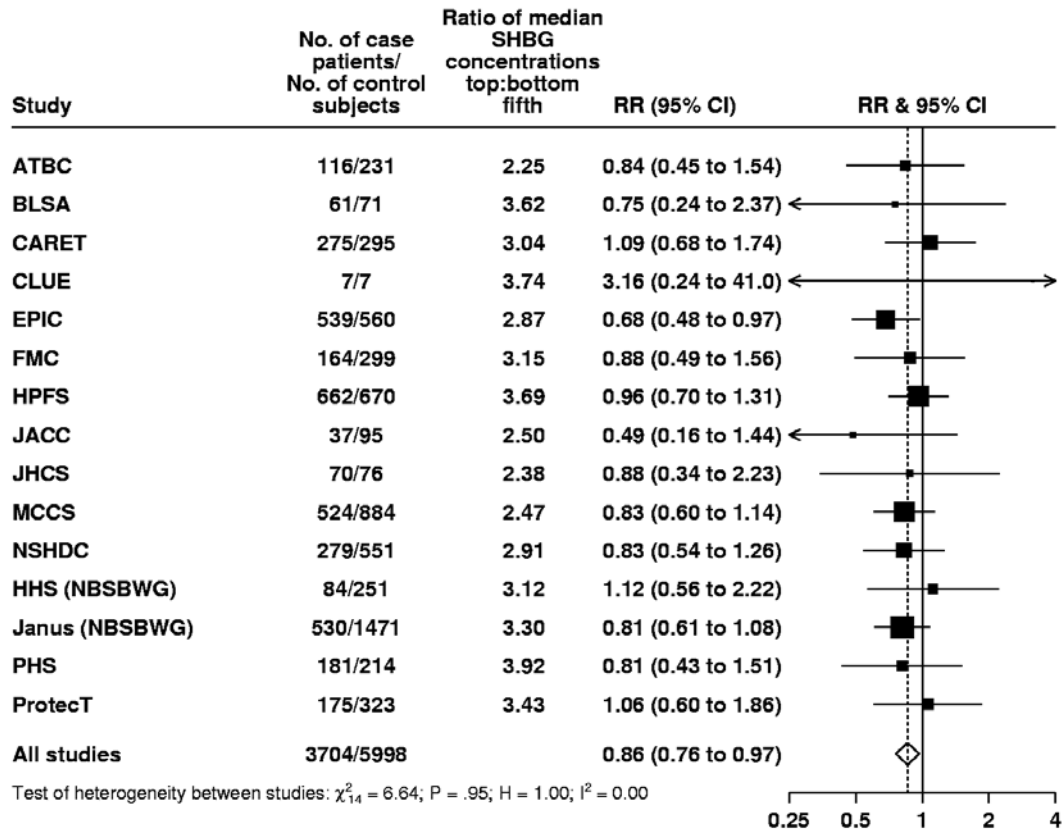

Supplement: NIHMS985220-supplement-Supplementary_Files_1-9.pdf [file NIHMS985220-supplement-Supplementary_Files_1-9.pdf]
