# Supplementary material
Source: PubMed Central journal article supplement (PMC6126902)
Supplement: NIHMS985220-supplement-Supplementary_Tables_1-2.pdf [file NIHMS985220-supplement-Supplementary_Tables_1-2.pdf]

**Supplementary Table 1.** Criteria used by individual studies to match case patients and control subjects\*

| Study (ref.)        | Case/control ratio | Age at recruitment   | Date of recruitment                                                         | Time of blood draw                                       | Other matching criteria                                                                                                  |
|---------------------|--------------------|----------------------|-----------------------------------------------------------------------------|----------------------------------------------------------|--------------------------------------------------------------------------------------------------------------------------|
| ATBC (17)           | 2:1                | ±1 y                 | ±28 days                                                                    |                                                          | Trial intervention group and local study center                                                                          |
| BLSA (11,24)†       | 1:1                | ±6 mo                | Same age at first visit. Follow-up time > time to diagnosis of case patient |                                                          |                                                                                                                          |
| CARET (21)          | 1:1                | Within 5 y           | Month from enrollment to blood draw                                         | Within 2 h                                               | Study center, year of randomization, and race                                                                            |
| CLUE (9,10)         | 1:1                | ±1 y                 | ±3 wk                                                                       |                                                          | Recruitment center and time between blood draw and last food or drink consumption                                        |
| EPIC (27)           | 1:1                | ±6 mo                | Matched for follow-up time                                                  | ±1 h                                                     |                                                                                                                          |
| FMC (18)            | 2:1                | Nearest available    | Matched by municipality (±1 mo)                                             |                                                          | Use of trial medication and local study center                                                                           |
| HHS (NBSBWG) (22)   | 4:1                | ±2 y                 | ±2 mo                                                                       |                                                          |                                                                                                                          |
| HPFS (25)           | 1:1                | Year of birth ±1 y   | Exact year                                                                  | Midnight–9 am; 9 am–12 pm; 12 pm–4 pm; and 4 pm–midnight | PSA test before blood draw and season; control subjects had at least one screening PSA test after the date of blood draw |
| JACC (23)           | 3:1                | As close as possible |                                                                             |                                                          | Recruitment area                                                                                                         |
| Janus (16)          | 3:1                | Year of birth ±1 y   | ±6 mo                                                                       |                                                          | N/A                                                                                                                      |
| Janus (NBSBWG) (22) | 4:1                | Year of birth ±2 y   | ±6 mo                                                                       |                                                          | County of residence and Red Cross blood donor status (Oslo)                                                              |
| JHCS (7,14)         | 1:1                | Same age             | Same month or year of recruitment                                           | Same hour of recruitment                                 |                                                                                                                          |
| KPMCP (12)          | 3:1                | Same age             |                                                                             |                                                          | Batch number and country of birth                                                                                        |
| MCCS (26)†          | 3:1                | ±60 mo               |                                                                             |                                                          |                                                                                                                          |
| NSHDC (22)          | 2:1                | ±6 mo                | ±2 mo                                                                       |                                                          | Town or area of residency                                                                                                |
| PHS (13)            | 2:1                | ±1 year              |                                                                             |                                                          | Had not had a total or partial prostatectomy and smoking status                                                          |
| ProtecT (28)        | 2:1                | 2-y bands            | Closest calendar date                                                       |                                                          | Primary care physician practice                                                                                          |
| RBS (8)†            | 3:1                | ±24 mo               | ±18 mo                                                                      | ±2 h                                                     | Race and smoking status                                                                                                  |

\*ATBC = Alpha-Tocopherol, Beta-Carotene Cancer Prevention Study; BLSA = Baltimore Longitudinal Study of Aging; CARET = Carotene and Retinol Efficacy Trial; CLUE = CLUE Study; Washington County, MD; EPIC = European Prospective Investigation into Cancer and Nutrition; FMC = Finnish Mobile Clinic Health Examination Survey; HHS = Helsinki Heart Study; HPFS = Health Professionals Follow-up Study; JACC = Japan Collaborative Cohort Study; Janus = Janus Serum Bank; JHCS = Japan–Hawaii Cancer Study; KPMCP = Kaiser Permanente Medical Care Program; MCCS = Melbourne Collaborative Cohort Study; NBSBWG = Nordic Biological Specimen Biobank Working Group; NSHDC = Northern Sweden Health and Disease Cohort; PHS = Physician’s Health Study; ProtecT = Prostate Testing for Cancer and Treatment; RBS = Rancho Bernardo Study; PSA = prostate-specific antigen.

†Used a case–cohort design that was subsequently converted into nested case–control design.

**Supplementary Table 2.** Assay method, manufacturer, and reported coefficients of variation for each study\*

| Study (ref.)                | Type of CV reported         | Testosterone                                                           | DHT                                                  | Androstenediol glucuronide                                            | DHEA-S                                                                | Androstenedione                                            | Estradiol                                                     | SHBG                                                                  |
|-----------------------------|-----------------------------|------------------------------------------------------------------------|------------------------------------------------------|-----------------------------------------------------------------------|-----------------------------------------------------------------------|------------------------------------------------------------|---------------------------------------------------------------|-----------------------------------------------------------------------|
| ATBC (17)                   | Intra-assay                 | RIA† (Endocrine Sciences, Calabasas Hills, CA), CV = 5.5%              | RIA† (Endocrine Sciences), CV = 8.9%                 | RIA† (Endocrine Sciences), CV = 12.3%                                 | RIA (Endocrine Sciences), CV = 11.3%                                  | RIA‡ (Endocrine Sciences), CV = 7.0%                       | RIA† (Quest Diagnostics, San Juan Capistrano, CA), CV = 13.7% | IRMA (Endocrine Sciences), CV = 4.2%                                  |
| BLSA (11,24)                | None                        | RIA                                                                    |                                                      |                                                                       | U/K                                                                   |                                                            |                                                               | RIA (Radim)                                                           |
| CARET (21)                  | Intra- and interassay range | RIA† (Diagnostic Systems Laboratories Inc, Webster, TX), CV = 1%–12%   |                                                      | Double-antibody (Diagnostic Systems Laboratories Inc), CV = 1.5%–4.8% | Double-antibody (Diagnostic Systems Laboratories Inc), CV = 0.8%–1.9% | RIA† (Diagnostic Systems Laboratories Inc), CV = 5%–9%     | RIA† (Pantex, Santa Monica, CA), CV = 5%–13%                  | RIA (Diagnostic Systems Laboratories Inc), CV = 2%–7%                 |
| CLUE (9,10)                 | U/K                         | RIA, CV = 8%                                                           | RIA, CV = 20%                                        |                                                                       | RIA (Wein Labs, Succasunna, NJ), CV < 10%                             |                                                            | RIA, CV = 26%                                                 | RIA, CV N/A                                                           |
| EPIC (27)                   | Intra-assay                 | RIA (Immunotech, Marseilles, France), CV = 10.8%–14.8%                 |                                                      | RIA (Diagnostic Systems Laboratories Inc), CV = 4.1%–9.9%             |                                                                       | RIA (Diagnostic Systems Laboratories Inc), CV = 3.5%–11.1% |                                                               | IRMA (Cis-Bio International, Gif-Sur-Yvette, France), CV = 7.7%–12.2% |
| FMC (18)                    | Interassay                  | RIA (Diagnostic Products Corporation, Los Angeles, CA), CV = 4.5%–7.2% |                                                      |                                                                       |                                                                       | RIA (Diagnostic Products Corporation), CV = 9.5%–11.7%     |                                                               | FIA (Wallace, Turku, Finland), CV = 6.6%–8.7%                         |
| HPFS (25)                   | Intra-assay                 | Chemiluminescence (Roche Diagnostics, Indianapolis, IN), CV = 4.9%     | RIA (Diagnostic Systems Laboratories Inc), CV = 9.7% | RIA (Diagnostic Systems Laboratories Inc), CV = 6.7%                  |                                                                       |                                                            | RIA (Diagnostic Systems Laboratories Inc), CV = 5.2%          | IRMA (Diagnostic Systems Laboratories Inc), CV = 10.7%                |
| JACC (23)                   | U/K                         | RIA (Diagnostic Products Corporation), CV = 5%–12%                     |                                                      |                                                                       |                                                                       |                                                            |                                                               | IRMA (Diagnostic Products Corporation), CV = 5.6%–6.9%                |
| Janus (16)                  | Intra- and interassay range | RIA†, CV = 5%–15%                                                      | RIA†, CV = 5%–15%                                    | RIA§, CV = 5%–15%                                                     |                                                                       |                                                            |                                                               | Ammonium sulfate precipitation, CV = 5%–15%                           |
| JHCS (7,14)                 | Intra- and interassay range | RIA† (in-house), CV = 5%–15%                                           | RIA† (in-house), CV = 5%–15%                         | RIA† (in-house), CV = 5%–15%                                          |                                                                       | RIA† (in-house), CV = 5%–15%                               | RIA (in-house)                                                | Ammonium sulfate precipitation, CV = 5%–15%                           |
| KPMCP (12)                  | None                        |                                                                        |                                                      |                                                                       | RIA                                                                   |                                                            |                                                               |                                                                       |
| MCCS (26)                   | U/K                         | Chemiluminescence (Roche, Mannheim, Germany), CV = 1.6%                |                                                      | RIA (Diagnostic Systems Laboratories Inc), CV = 4.3%                  | Immunoassay (Diagnostic Products Corporation), CV = 12.4%             | RIA (Diagnostic Systems Laboratories Inc), CV = 3.3%       | Chemiluminescence (Roche), CV = 11.1%                         | Immunometric (Diagnostic Products Corporation), CV = 6%               |
| NBSBWG (HHS and Janus) (22) | Intra- and interassay range | FIA (Delfia, Turku, Finland), CV = 5.5%–13%                            |                                                      |                                                                       |                                                                       |                                                            |                                                               | IMFR (Delfia), CV = 1.3%–10.1%                                        |
| NSHDC (22)                  | None                        | RIA (Orion Diagnostica, Espoo, Finland)                                |                                                      |                                                                       |                                                                       |                                                            | U/K                                                           | IRMA (Delfia)                                                         |
| PHS (13)                    | Intra-assay                 | Direct RIA (ICN Biomedicals, Costa Mesa, CA), CV = 8.7%                | RIA†, CV = 5.3%                                      | RIA (Diagnostic Systems Laboratories Inc), CV = 7.6%                  |                                                                       |                                                            | RIA (Diagnostic Products Corporation), CV = 6.8%              | RIA (Orion Diagnostica, Oulu, Finland), CV = 8.9%                     |
| ProtecT (28)                | None                        | U/K                                                                    |                                                      |                                                                       |                                                                       |                                                            |                                                               | U/K                                                                   |
| RBS (8)                     | Intra- and interassay range | RIA† (in-house), CV = 4.1%–10%                                         | U/K, CV N/A                                          |                                                                       |                                                                       | RIA† (in-house), CV = 4%–8%                                | RIA† (in-house), CV = 8%–12%                                  |                                                                       |

\*ATBC = Alpha-Tocopherol, Beta-Carotene Cancer Prevention Study; BLSA = Baltimore Longitudinal Study of Aging; CARET = Carotene and Retinol Efficacy Trial; CLUE = CLUE Study, Washington County, MD; EPIC = European Prospective Investigation into Cancer and Nutrition; FMC = Finnish Mobile Clinic Health Examination Survey; HHS = Helsinki Heart Study; HPFS = Health Professionals Follow-up Study; JACC = Japan Collaborative Cohort Study; Janus = Janus Serum Bank; JHCS = Japan–Hawaii Cancer Study; KPMCP = Kaiser Permanente Medical Care Program; MCCS = Melbourne Collaborative Cohort Study; NBSBWG = Nordic Biological Specimen Biobank Working Group; NSHDC = Northern Sweden Health and Disease Cohort; PHS = Physician’s Health Study; ProtecT = Prostate Testing for Cancer and Treatment; RBS = Rancho Bernardo Study; DHT = dihydrotestosterone; DHEA-S = dehydroepiandrosterone sulfate; SHBG = sex hormone-binding globulin; RIA = radioimmunoassay; CV = coefficient of variation; IRMA = immunoradiometric assay; FIA = fluoroimmunoassay; U/K = Unknown method.

†Organic extraction and celite column chromatography before RIA.

‡After organic extraction and centrifugation.

§After β-glucuronidase hydrolysis.
